# Supplementary material for: T cell-attracting CCL18 chemokine is a dominant rejection signal during limb transplantation
Source: PubMed Central journal article supplement — Cell Rep Med. 2022 Mar 15;3(3):100559. doi: 10.1016/j.xcrm.2022.100559 (PMC9040185; doi:10.1016/j.xcrm.2022.100559), 2022-03-15
Supplement: mmc1.pdf [file mmc1.pdf]

**Cell Reports Medicine, Volume 3**

**Supplemental information**

**T cell-attracting CCL18 chemokine is a dominant  
rejection signal during limb transplantation**

**Thiago J. Borges, Phammela Abarzua, Rodrigo B. Gassen, Branislav Kollar, Mauricio Lima-Filho, Bruno T. Aoyama, Diana Gluhova, Rachael A. Clark, Sabina A. Islam, Bohdan Pomahac, George F. Murphy, Christine G. Lian, Simon G. Talbot, and Leonardo V. Riella**

## **Supplemental Information**

Borges et al.

T cell-attracting CCL18 chemokine is a dominant rejection signal during limb transplantation

Supplementary Figures:

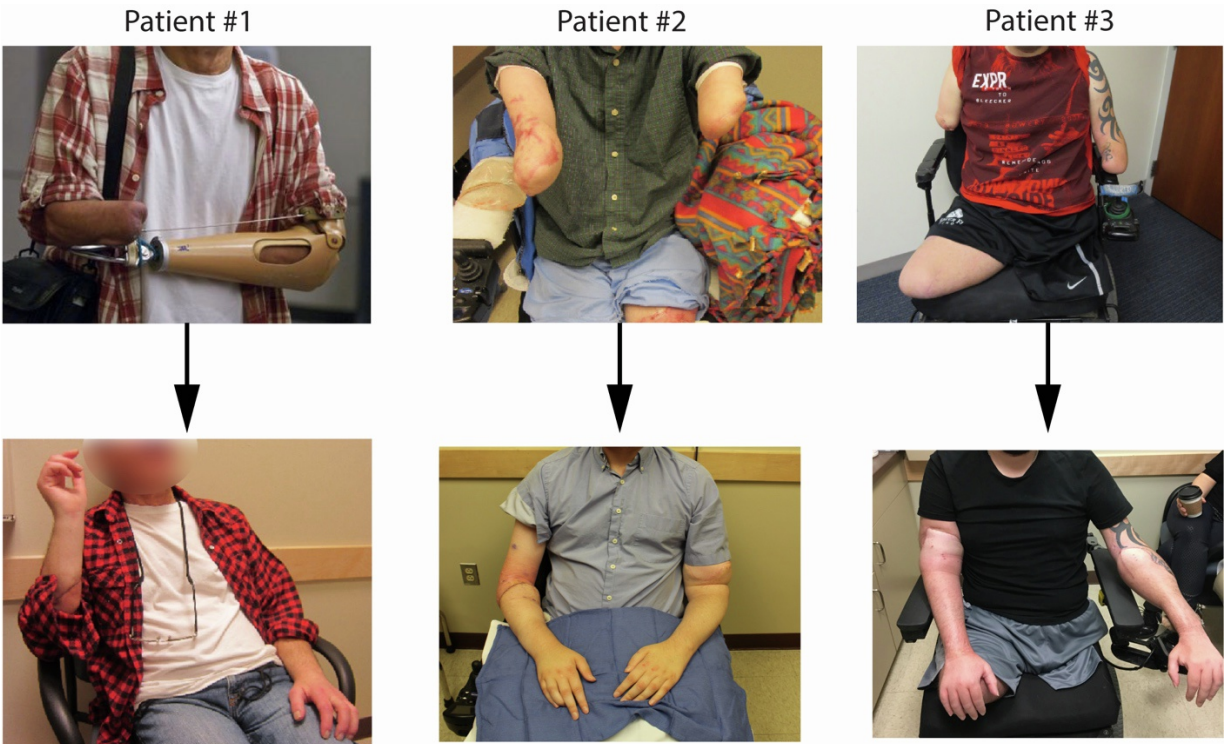

**Figure S1. Photographs of the three patients before and after the transplantation.** Patients provided written consent for the publication of their pictures. Related to Figure 1.

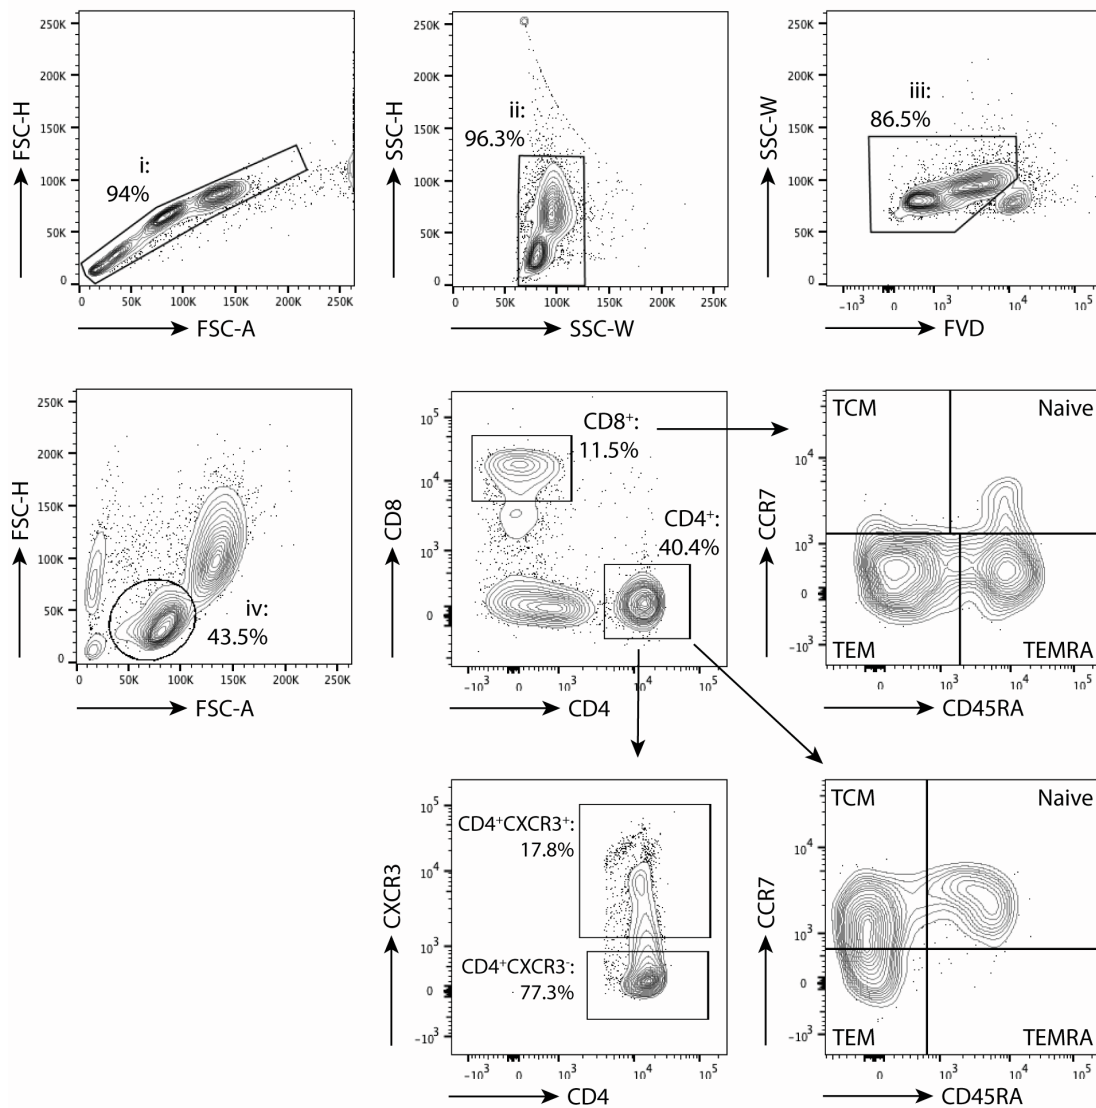

**Figure S2. Gating strategy of the T-cell populations from peripheral blood analyzed in this study.** All samples were analyzed with FlowJo software. FVD = Fixable viability dye. Related to Figure 1.

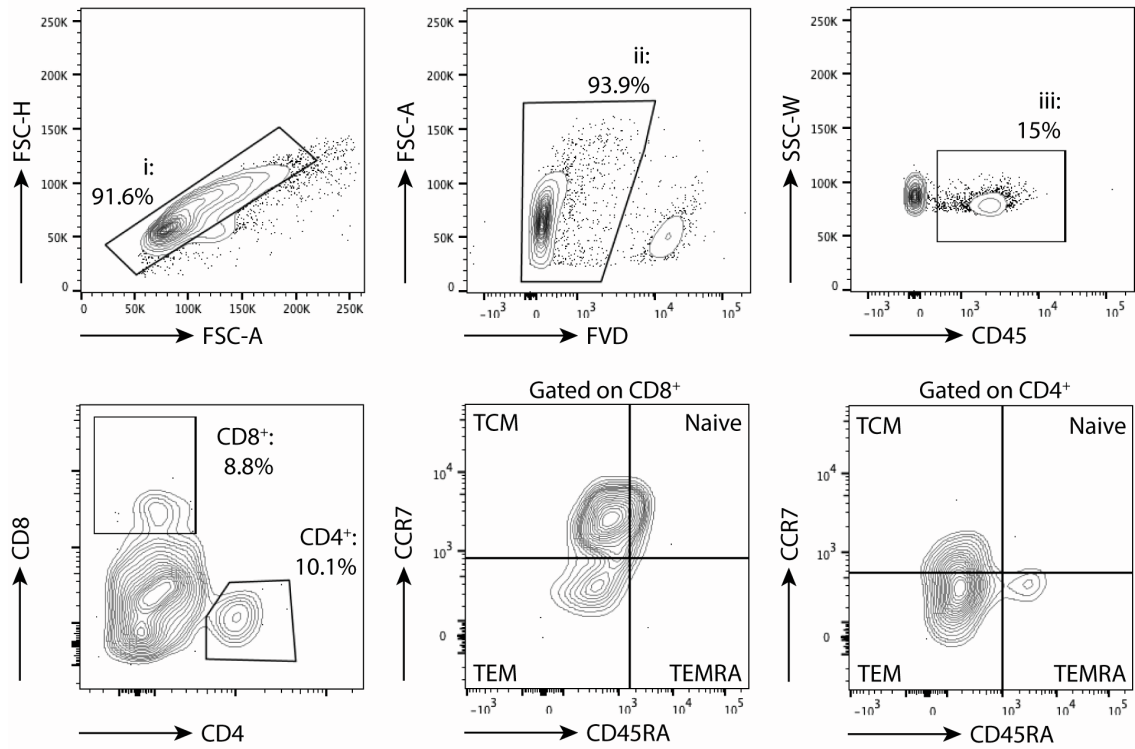

**Figure S3. Gating strategy of the T-cell populations from allograft and native skin of upper extremities recipients.** All samples were analyzed with FlowJo software. FVD = Fixable viability dye. Related to Figure 2.

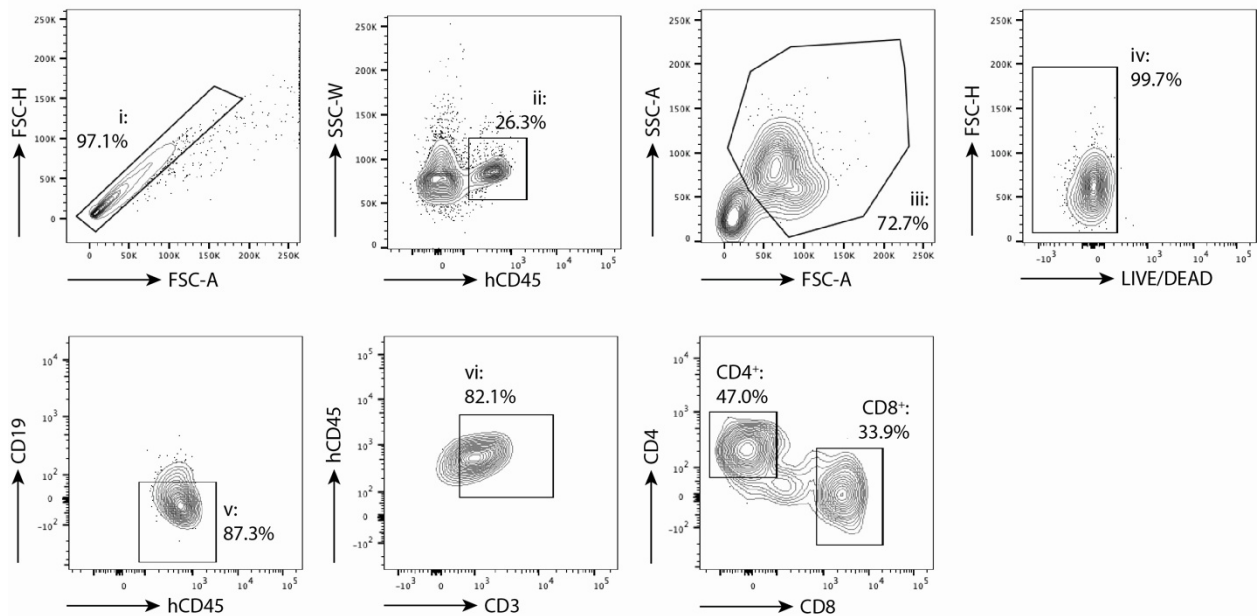

**Figure S4. Gating strategy of the T-cell populations from xenografts transplanted onto NSG recipient mice.** All samples were analyzed with FlowJo software. Related to Figure 6.
